# Supplementary material
Source: HighWire-hosted journal article supplement (https://bmjopen.bmj.com/content/15/1/e093872)
Supplement: inline-supplementary-material-2 [file inline-supplementary-material-2.pdf]

Supplementary material

1. Procedure of content analysis

| Categories          | Subcategories        | Codes                                      | Quotes                                                                                                                                                                                                                               |
|---------------------|----------------------|--------------------------------------------|--------------------------------------------------------------------------------------------------------------------------------------------------------------------------------------------------------------------------------------|
| Executive Functions | Problem-solving      | Performance awareness                      | And I have learned to walk, so that it works. But it was an effort I didn't think I would have to make. But it was the first time in these 50 years that I feel strained (P01)                                                       |
|                     |                      |                                            | So you learn a lot of tricks. You position yourself in a corner. Leverage against the back, and then you stand on the leg you're allowed to put weight on. Yes, and then you manage some things with the coffee maker (P43)          |
|                     | Emotional regulation | Feeling grumpy and snapping                | I've been a bit grumpy, I guess. I don't need to hide that. But no one has taken offense. I've tried to be kind and nice, but sometimes you just snap a bit (P10).                                                                   |
|                     |                      | Having a short fuse                        | So, I have a pretty short fuse, and I lose patience when things don't go smoothly... like when I can't put on my pants and stuff, so then I get angry. And then it might happen that a crutch ends up in the wall or something (P31) |
|                     | Energization         | Avoiding initiatives and others            | Yeah, I've mostly been lying in bed. That's what I've done. And I've been served food and everything, I haven't had to do anything. I have my grandchildren living with me, so he has helped a lot (P06).                            |
|                     |                      | Not thorough as before and delaying action | I notice that's not like me. I am very thorough about everything. But now, there are things everywhere, and, by the way, it's hard to pick up. But I think, well, I'll do that later. But I haven't done it yet (P08).               |
|                     | Fatigue              | Mental fatigue                             |                                                                                                                                                                                                                                      |
|                     |                      | Motoric fatigue                            | But administrative tasks are no problem, but sitting down to write assignments, I don't have the concentration for that. I get too tired (P31).                                                                                      |

|                      |                                  |                                           |                                                                                                                                                                                                                                                                                                                                                                                                                                                                                                                                                                                                                 |
|----------------------|----------------------------------|-------------------------------------------|-----------------------------------------------------------------------------------------------------------------------------------------------------------------------------------------------------------------------------------------------------------------------------------------------------------------------------------------------------------------------------------------------------------------------------------------------------------------------------------------------------------------------------------------------------------------------------------------------------------------|
| Attention and memory |                                  |                                           | <p>The only thing I've managed is to go to the bathroom and take care of my needs and... yes, brush my teeth and things like that. // I can handle such tasks, but nothing else. I don't have the energy for it, I'm too tired. // I couldn't even dress myself at first. My husband had to help me get dressed, you know (P06).</p> <p>I am tired, physically ... if I go out and walk, as I have tried to do for the last three days...then I am quite tired afterwards...Yes, it's time to lie down. And then I'm not really fit for fight ... I'm don't have much energy for the rest of the day. (P31)</p> |
|                      | Subjective memory decline        | Doubting memory function                  | But, you know, it's just that you start to think that you're not sure when you yourself stop noticing that you forget things (P05).                                                                                                                                                                                                                                                                                                                                                                                                                                                                             |
|                      |                                  | Memory decline                            | Yes, I feel like I've had a really poor memory for a long time now. Because I've been anxious about the surgery, and that affects concentration a bit. And I haven't been feeling very well before either (P07).                                                                                                                                                                                                                                                                                                                                                                                                |
|                      | Family concern of memory decline | Family member pointing out memory decline | If I have experienced some memory loss, it's possible, it's possible. Because our children said, 'Dad, you won't remember this. It was like this' (P01).                                                                                                                                                                                                                                                                                                                                                                                                                                                        |
|                      | Sustained attention              | Losing the thread                         | Now it can be distracting around as well, I mean you can... What should I say? You lose the thread. If we have a study that we have read, a large section, so... //Now I haven't had the energy to participate and haven't had the energy to read up. I can't go through everything now, no. I don't do that (P06).                                                                                                                                                                                                                                                                                             |
|                      |                                  | Feeling absent-minded                     | <p>So right now, I can read and read and read, and still, I find myself stuck on the same sentence, and then and then it's just as good to leave it// Uhm, concentration, I can't concentrate properly (P10).</p> <p>Today, I showered with the hearing aids on. It wasn't good (P01).</p>                                                                                                                                                                                                                                                                                                                      |

|                       |                      |                                        |                                                                                                                                                                                                                                                                                               |
|-----------------------|----------------------|----------------------------------------|-----------------------------------------------------------------------------------------------------------------------------------------------------------------------------------------------------------------------------------------------------------------------------------------------|
| Psychological factors |                      | Lack of focus                          | These last few days, I have found it challenging. I have these magazines that I subscribe to, that I receive. So I haven't had the energy to read them properly. I haven't been able to focus on it (P39).                                                                                    |
|                       | Sense of agency      | Lack of agency                         | But it's connected to the fact that I'm the kind of person who has a need for control, too, so that... And you don't have that when you surrender yourself to healthcare. (P05)                                                                                                               |
|                       |                      | Wanting to manage things independently | Sometimes it's my dear wife... I become more easily irritated, perhaps. It has to do with her trying to be overly protective and fetch everything for me, and I think to myself, "I can handle this on my own," and then I get slightly annoyed at trivial things that are not relevant (P03) |
|                       | Powerlessness        | Being dependant on others              | ...To 110%. I don't want to be dependent. Absolutely. //... Yes, I become disheartened and a little angry, and... What should I say? //... Just this being dependent, it's... Yes, I want to do everything myself if I may say so. Control my day, or control and manage and so on (P08)      |
|                       |                      |                                        | And the thing about being dependent on other people and... you don't want to bother people, even if they're your own sons, it feels like 'God, how annoying I am.' And then I get in a bad mood (P19).                                                                                        |
|                       | Physical limitations | Feeling low                            | I feel a bit depressed because I can't do anything, and not fix anything, not fetch anything, not pick up anything (P08)                                                                                                                                                                      |
|                       |                      |                                        | I have a different way, a different temperament. I don't recognize myself. I am sometimes sad, and that's not something I used to be (P46).                                                                                                                                                   |
|                       | Future perspectives  | Brighter outlook                       | I feel much more positive now than right after the surgery, as I sense that                                                                                                                                                                                                                   |

the pain is heading in the right direction, and the mobility in the operated leg also feels much better, in that way. So, I feel that I am regaining a bit more zest for life compared to before the surgery (P03).

I think maybe I was grumpier before the surgery than after, because now it's done. And now, well, theoretically at least, it can't get worse. Now it's just going to get better (P12)
